# Supplementary material for: Analysis of novel therapeutic targets and construction of a prognostic model for hepatocellular carcinoma
Source: PeerJ. 2025 Aug 22;13:e19899. doi: 10.7717/peerj.19899 (PMC12377355; doi:10.7717/peerj.19899)
Supplement: Supplemental Information 2 [file peerj-13-19899-s002.xlsx]

## Sheet: Sheet1
	CBS	actin
THLE-2	20.25	18.7228
THLE-2	20.18	18.7228
THLE-2	20.36	18.7228
MHCC97H	21.58	18.9305
MHCC97H	22.01	18.9305
MHCC97H	21.76	18.9305
