# Supplementary material for: Analysis of novel therapeutic targets and construction of a prognostic model for hepatocellular carcinoma
Source: PeerJ. 2025 Aug 22;13:e19899. doi: 10.7717/peerj.19899 (PMC12377355; doi:10.7717/peerj.19899)
Supplement: Supplemental Information 3 [file peerj-13-19899-s003.xls]

## Sheet: Sheet1
ITEM TO CHECK	IMPORTANCE	CHECKLIST
EXPERIMENTAL DESIGN
Definition of experimental and control groups	E	3-94
Number within each group	E	3-97
Assay carried out by core lab or investigator's lab?	D
Acknowledgement of authors' contributions	D	11-410
SAMPLE
Description	E	4-129
Volume/mass of sample processed	D
Microdissection or macrodissection	E	No such step
Processing procedure	E	4-134
If frozen - how and how quickly?	E	No such step
If fixed - with what, how quickly?	E	4-134
Sample storage conditions and duration (especially for FFPE samples)	E	4-134
NUCLEIC ACID EXTRACTION
Procedure and/or instrumentation	E	4-134
Name of kit and details of any modifications	E	4-134
Source of additional reagents used	D
Details of DNase or RNAse treatment	E	4-134
Contamination assessment (DNA or RNA)	E	4-134
Nucleic acid quantification	E	4-134
Instrument and method	E	4-134
Purity (A260/A280)	D
Yield	D
RNA integrity method/instrument	E	4-134
RIN/RQI or Cq of 3' and 5' transcripts	E	4-134
Electrophoresis traces	D
Inhibition testing (Cq dilutions, spike or other)	E	4-134
REVERSE TRANSCRIPTION
Complete reaction conditions	E	4-134
Amount of RNA and reaction volume	E	4-134
Priming oligonucleotide (if using GSP) and concentration	E	4-134
Reverse transcriptase and concentration	E	4-134
Temperature and time	E	4-134
Manufacturer of reagents and catalogue numbers	D
Cqs with and without RT	D*
Storage conditions of cDNA	D
qPCR TARGET INFORMATION
If multiplex, efficiency and LOD of each assay.	E	4-134
Sequence accession number	E	4-134
Location of amplicon	D
Amplicon length	E	4-134
In silico specificity screen (BLAST, etc)	E	4-134
Pseudogenes, retropseudogenes or other homologs?	D
Sequence alignment	D
Secondary structure analysis of amplicon	D
Location of each primer by exon or intron (if applicable)	E	4-134
What splice variants are targeted?	E	4-134
qPCR OLIGONUCLEOTIDES
Primer sequences	E	4-134
RTPrimerDB Identification Number	D
Probe sequences	D**	4-140
Location and identity of any modifications	E	4-134
Manufacturer of oligonucleotides	D
Purification method	D
qPCR PROTOCOL
Complete reaction conditions	E	4-134
Reaction volume and amount of cDNA/DNA	E	4-134
Primer, (probe), Mg++ and dNTP concentrations	E	4-134
Polymerase identity and concentration	E	4-134
Buffer/kit identity and manufacturer	E	4-134
Exact chemical constitution of the buffer	D
Additives (SYBR Green I, DMSO, etc.)	E	4-134
Manufacturer of plates/tubes and catalog number	D
Complete thermocycling parameters	E	4-134
Reaction setup (manual/robotic)	D
Manufacturer of qPCR instrument	E
qPCR VALIDATION
Evidence of optimisation (from gradients)	D
Specificity (gel, sequence, melt, or digest)	E	4-134
For SYBR Green I, Cq of the NTC	E	4-134
Standard curves with slope and y-intercept	E	4-134
PCR efficiency calculated from slope	E	4-134
Confidence interval for PCR efficiency or standard error	D
r2 of standard curve	E	4-134
Linear dynamic range	E	4-134
Cq variation at lower limit	E	4-134
Confidence intervals throughout range	D
Evidence for limit of detection	E	4-134
If multiplex, efficiency and LOD of each assay.	E	4-134
DATA ANALYSIS
qPCR analysis program (source, version)	E	4-134
Cq method determination	E	4-134
Outlier identification and disposition	E	4-134
Results of NTCs	E	4-134
Justification of number and choice of reference genes	E	4-134
Description of normalisation method	E	4-134
Number and concordance of biological replicates	D
Number and stage (RT or qPCR) of technical replicates	E	4-134
Repeatability (intra-assay variation)	E
Reproducibility (inter-assay variation, %CV)	D
Power analysis	D
Statistical methods for result significance	E	4-170
Software (source, version)	E
Cq or raw data submission using RDML	D
Table 1. MIQE checklist for authors, reviewers and editors. All essential information (E) must be submitted with the manuscript. Desirable
information (D) should be submitted if available. If using primers obtained from RTPrimerDB, information on qPCR target, oligonucleotides,
protocols and validation is available from that source.
*: Assessing the absence of DNA using a no RT assay is essential when first extracting RNA. Once the sample has been validated as
RDNA-free, inclusion of a no-RT control is desirable, but no longer essential.
**: Disclosure of the probe sequence is highly desirable and strongly encouraged. However, since not all commercial pre-designed assay
vendors provide this information, it cannot be an essential requirement. Use of such assays is advised against.
